# Supplementary material
Source: PubMed Central journal article supplement (PMC3131440)
Supplement: NIHMS297175-supplement-1.pdf [file NIHMS297175-supplement-1.pdf]

Supplemental table 1: Clone Accession Number Designation, Sample Source, CDR3 Region Analysis and Clone Size

| GenBank Accession number | Case ID | Sample Source                   | Calcific Aortic Stenosis Valve Type | TRBV    | CDR3 length (IMGT) | CDR3 Sequence, Analysis and Translation *                                      | TRBD | TRBJ   | Number of Sequences Comprising Clone† | For clones shared between sites                                        |                                                             |
|--------------------------|---------|---------------------------------|-------------------------------------|---------|--------------------|--------------------------------------------------------------------------------|------|--------|---------------------------------------|------------------------------------------------------------------------|-------------------------------------------------------------|
|                          |         |                                 |                                     |         |                    |                                                                                |      |        |                                       | Percentage TRBV family accounted for by clone determined by sequencing | Percentage of entire repertoire in sample occupied by clone |
| JF731129                 | T54     | Valve Leaflet                   | Tricuspid Valve                     | 7-6*01  | 12                 | TGTGCCAGCAGCTTAGataccCGCGGGGATACGCAGTATTTT<br>C A S S L D T R G D T Q Y F      | 2*01 | 2-3*01 | 4                                     | 8.9                                                                    | 0.804                                                       |
| JF731130                 | T54     | Circulating CD8+CD28neg T cells | Tricuspid Valve                     | 7-6*01  | 12                 | TGTGCCAGCAGCTTAGataccCGCGGGGATACGCAGTATTTT<br>C A S S L D T R G D T Q Y F      | 2*01 | 2-3*01 | 38                                    | 97.4                                                                   | 2.47                                                        |
| JF731131                 | T54     | Valve Leaflet                   | Tricuspid Valve                     | 12-3*01 | 13                 | TGTGCCAGCAGTagaACTAGCGGGGtCTACAATGAGCAGTTCTTC<br>C A S S R T S G V Y N E Q F F | 2*01 | 2-1*01 | 11                                    | 55                                                                     | 1.39                                                        |
| JF731132                 | T54     | Circulating CD8+CD28neg T cells | Tricuspid Valve                     | 12-3*01 | 13                 | TGTGCCAGCAGTagaACTAGCGGGGtCTACAATGAGCAGTTCTTC<br>C A S S R T S G V Y N E Q F F | 2*01 | 2-1*01 | 22                                    | 55                                                                     | 3.06                                                        |
| JF731133                 | T55     | Valve Leaflet                   | Tricuspid Valve                     | 11-2*03 | 12                 | TGTGCCAGCAGCTTAGctttGGctttCAATGAGCAGTTCTTC<br>C A S S L A L A F N E Q F F      | 1*01 | 2-1*01 | 18                                    | 85.7                                                                   | 10.94                                                       |
| JF731134                 | T55     | Circulating CD8+CD28neg T cells | Tricuspid Valve                     | 11-2*03 | 12                 | TGTGCCAGCAGCTTAGctttGGctttCAATGAGCAGTTCTTC<br>C A S S L A L A F N E Q F F      | 1*01 | 2-1*01 | 3                                     | 17.7                                                                   | 1.51                                                        |
| JF731135                 | T55     | Circulating CD8+CD28+ T cells   | Tricuspid Valve                     | 11-2*03 | 12                 | TGTGCCAGCAGCTTAGctttGGctttCAATGAGCAGTTCTTC<br>C A S S L A L A F N E Q F F      | 1*01 | 2-1*01 | 4                                     | 20                                                                     | 1.97                                                        |
| JF731136                 | T54     | Valve Leaflet                   | Tricuspid Valve                     | 7-6*01  | 10                 | TGTGCCAGCAGCCAGGctccggggaAAGCTTCTTT<br>C A S S Q A P G K A F F                 | 1*01 | 1-1*01 | 8                                     | 18.6                                                                   | 1.68                                                        |

|          |     |                               |                 |         |    |                                                                                                    |      |        |    |     |      |
|----------|-----|-------------------------------|-----------------|---------|----|----------------------------------------------------------------------------------------------------|------|--------|----|-----|------|
| JF731137 | T54 | Circulating CD8+CD28+ T cells | Tricuspid Valve | 7-6*01  | 10 | TGTGCCAGCAGCCAGGctccggggaAAGCTTCTTT<br>C A S S Q A P G K A F F                                     | 1*01 | 1-1*01 | 4  | 9.3 | 0.53 |
| JF731138 | T55 | Valve Leaflet                 | Tricuspid Valve | 11-2*01 | 17 | TGTGCCAGCAGCTTAaatGACAGGGGagtaggacttagCTCCTACGAGCAGTACTTC<br>C A S S L N D R G V G L S S Y E Q Y F | 1*01 | 2-7*01 | 2  | 9.5 | 1.21 |
| JF731139 | T55 | Circulating CD8+CD28+ T cells | Tricuspid Valve | 11-2*01 | 17 | TGTGCCAGCAGCTTAaatGACAGGGGagtaggacttagCTCCTACGAGCAGTACTTC<br>C A S S L N D R G V G L S S Y E Q Y F | 1*01 | 2-7*01 | 11 | 55  | 5.41 |
| JF731140 | T54 | Valve Leaflet                 | Tricuspid Valve | 7-9*01  | 15 | TGCGCCAGCAGCTcaaacGACTAGCGGGAGagtCCGGGAGCTGTTTTTT<br>C A S S S K R L A G E S G E L F F             | 2*02 | 2-2*01 | 1  | 2.2 | 0.19 |
| JF731141 | T54 | Circulating CD4+ T cells      | Tricuspid Valve | 7-9*01  | 15 | TGTGCCAGCAGCTcaaacGACTAGCGGGAGagtCCGGGAGCTGTTTTTT<br>C A S S S K R L A G E S G E L F F             | 2*02 | 2-2*01 | 1  | 2.6 | 0.12 |
| JF731142 | B14 | Valve Leaflet                 | Bicuspid Valve  | 5-6*01  | 11 | TGTGCCAGCAGaaatGACAGtaAAGAGACCCAGTACTTC<br>C A S R N D S K E T Q Y F                               | 1*01 | 2-5*01 | 5  |     |      |
| JF731143 | B14 | Valve Leaflet                 | Bicuspid Valve  | 5-5*01  | 11 | TGTGCCAGCAGCgggatgAGCGGAGAGACCCAGTACTTC<br>C A S S G M S G E T Q Y F                               | 2*01 | 2-5*01 | 6  |     |      |
| JF731144 | B14 | Valve Leaflet                 | Bicuspid Valve  | 5-1*01  | 11 | TGCGCCAGCAGCTTGcGCGGGGGGACGAGCAGTACTTC<br>C A S S L R G G D E Q Y F                                | 2*01 | 2-7*01 | 3  |     |      |
| JF731145 | B14 | Valve Leaflet                 | Bicuspid Valve  | 5-6*01  | 11 | TGTGCCAGCAGCcggGACAaTACAATGAGCAGTTCTTC<br>C A S S R G Q Y N E Q F F                                | 1*01 | 2-1*01 | 1  |     |      |
| JF731146 | B14 | Valve Leaflet                 | Bicuspid Valve  | 5-4*01  | 12 | TGTGCCAGCAGCTTGgagaCGAACACCGGGAGCTGTTTTTT<br>C A S S L E T N T G E L F F                           | none | 2-2*01 | 3  |     |      |
| JF731147 | B14 | Valve Leaflet                 | Bicuspid Valve  | 5-1*01  | 13 | TGCGCCAGCAGCatGCGGcagattgaaaACAATGAGCAGTTCTTC<br>C A S S M R Q I E N N E Q F F                     | 2*01 | 2-1*01 | 1  |     |      |
| JF731148 | B14 | Valve Leaflet                 | Bicuspid Valve  | 5-1*01  | 13 | TGCGCCAGCAGCTcgGCGGGaCGAACACCGGGAGCTGTTTTTT<br>C A S S S A G T N T G E L F F                       | 2*01 | 2-2*01 | 1  |     |      |

|          |     |               |                 |        |    |                                                                                                         |      |        |   |
|----------|-----|---------------|-----------------|--------|----|---------------------------------------------------------------------------------------------------------|------|--------|---|
| JF731149 | B14 | Valve Leaflet | Bicuspid Valve  | 5-1*01 | 14 | TGCGCCAGCAttaatggttGGGGGttccgcgcctTACGAGCAGTACTTC<br>C A S I N V G G S A P Y E Q Y F                    | 2*01 | 2-7*01 | 1 |
| JF731150 | B14 | Valve Leaflet | Bicuspid Valve  | 5-6*01 | 14 | TGTGCCAGCAGCTTGGggctgGGGACcggatCCTACGAGCAGTACTTC<br>C A S S L G L G T G S Y E Q Y F                     | 2*01 | 2-7*01 | 4 |
| JF731151 | B14 | Valve Leaflet | Bicuspid Valve  | 5-6*01 | 14 | TGTGCCAGCAGCTTGatcgAGCGGGAGGGggCCGGGGAGCTGTTTTTTT<br>C A S S L I E R E G A G E L F F                    | 2*02 | 2-2*01 | 2 |
| JF731152 | B14 | Valve Leaflet | Bicuspid Valve  | 5-4*01 | 14 | TGTGCCAGCAGCTTattatccGGGACTAGCACAGATACGCAGTATTTT<br>C A S S L L S G T S T D T Q Y F                     | 2*01 | 2-3*01 | 1 |
| JF731153 | B14 | Valve Leaflet | Bicuspid Valve  | 5-1*01 | 14 | TGCGCCAGCAGCagtACTAGCGGGAGccGCACAGATACGCAGTATTTT<br>C A S S S T S G S R T D T Q Y F                     | 2*02 | 2-3*01 | 5 |
| JF731154 | B14 | Valve Leaflet | Bicuspid Valve  | 5-1*01 | 15 | TGCGCCAGCAGCgtgccagAGGGtaggacggttagCCTACGAGCAGTACTTC<br>C A S S V P E G R T V A Y E Q Y F               | 2*02 | 2-7*01 | 2 |
| JF731155 | B14 | Valve Leaflet | Bicuspid Valve  | 5-1*01 | 18 | TGCGCCAGCcaatcctccgggacaggGGGACTAGCGGGAGtttatgggGAGCAGTACTTC<br>C A S Q S S G T G G L A G V Y G E Q Y F | 2*02 | 2-7*01 | 1 |
| JF731156 | T10 | Valve Leaflet | Tricuspid Valve | 5-1*01 | 10 | TGTGCCAGCAGCacggccgGCCGGCAGCAGTACTTC<br>C A S S T A G G E Q Y F                                         | 2*01 | 2-7*01 | 2 |
| JF731157 | T10 | Valve Leaflet | Tricuspid Valve | 5-1*01 | 11 | TGCGCCAGCAGCTTGGtgtACAGCTATGGCTACACCTTC<br>C A S S L V Y S Y G Y T F                                    | 1*01 | 1-2*01 | 3 |
| JF731158 | T10 | Valve Leaflet | Tricuspid Valve | 5-n    | 12 | TGTGCCAGCAGCTTGaaatttacGAACACTGAAGCTTTCTTT<br>C A S S L K F T N T E A F F                               | none | 1-1*01 | 2 |
| JF731159 | T10 | Valve Leaflet | Tricuspid Valve | 5-1*01 | 12 | TGCGCCAGCAGCTactcgatCGGGGGAGATACGCAGTATTTT<br>C A S S Y S I G G D T Q Y F                               | 2*01 | 2-3*01 | 5 |
| JF731160 | T10 | Valve Leaflet | Tricuspid Valve | 5-1*01 | 13 | TGCGCCAGCAGCTTGGCGGGAGcaccCAAGAGACCCAGTACTTC<br>C A S S L A G A P Q E T Q Y F                           | 2*02 | 2-5*01 | 2 |

|          |     |               |                 |        |    |                                                                                          |      |        |    |
|----------|-----|---------------|-----------------|--------|----|------------------------------------------------------------------------------------------|------|--------|----|
| JF731161 | T10 | Valve Leaflet | Tricuspid Valve | 5-1*01 | 13 | TGCGCCAGCAGCTTGGatcCAGGGGGCctcaGGGAGCTGTTTTTT<br>C A S S L D P G G L R E L F F           | 1*01 | 2-2*01 | 4  |
| JF731162 | T10 | Valve Leaflet | Tricuspid Valve | 5-1*01 | 13 | TGCGCCAGCAGCTtcccggggAGCGGGctCTACGAGCAGTACTTC<br>C A S S S P G S G L Y E Q Y F           | 2*01 | 2-7*01 | 13 |
| JF731163 | T10 | Valve Leaflet | Tricuspid Valve | 5-n    | 14 | TGTGCCAGCAGCTTGGGCGGctcgacgAGCACAGATACGCAGTATTTT<br>C A S S L G G S T S T D T Q Y F      | 2*01 | 2-3*01 | 2  |
| JF731164 | T10 | Valve Leaflet | Tricuspid Valve | 5-5*01 | 15 | TGTGCCAGCAGCTTagagGGGAGtggaataccctcgagccgGCAGTTCTTC<br>C A S S L E G S G I P S S R Q F F | 2*02 | 2-1*01 | 5  |
| JF731165 | T57 | Valve Leaflet | Tricuspid Valve | 7-3*03 | 10 | CGTGCCAGCAGCTTGGAtggCAATGAGCAGTTCTTC<br>R A S S L D G N E Q F F                          | 2*01 | 2-1*01 | 6  |
| JF731166 | T57 | Valve Leaflet | Tricuspid Valve | 7-2*01 | 10 | TGTGCCAGCAGCaccCaGGGACtTGGCTACACCTTC<br>C A S S T Q G L G Y T F                          | 1*01 | 1-2*01 | 12 |
| JF731167 | T57 | Valve Leaflet | Tricuspid Valve | 7-2*01 | 11 | TGTGCCAGCAGCTTAGaCGGGccgataggGCTGTTTTTTT<br>C A S S L D G P I G L F F                    | 2*01 | 2-2*01 | 8  |
| JF731168 | T57 | Valve Leaflet | Tricuspid Valve | 7-2*01 | 11 | TGTGCCAGCAGCTTAGGGGtcagcactGAGCAGTTCTTC<br>C A S S L G V S T E Q F F                     | 2*01 | 2-1*01 | 2  |
| JF731169 | T57 | Valve Leaflet | Tricuspid Valve | 7-2*01 | 13 | TGTGCCAGCAGCTTcgacGGGACAGtCACAGATACGCAGTATTTT<br>C A S S F D G T V T D T Q Y F           | 1*01 | 2-3*01 | 5  |
| JF731170 | T54 | Valve Leaflet | Tricuspid Valve | 7-9*01 | 10 | TGTGCCAGCAGCTTAGGAGGGagcaAGCAGTACTTC<br>C A S S L G G S K Q Y F                          | 2*02 | 2-7*01 | 6  |
| JF731171 | T54 | Valve Leaflet | Tricuspid Valve | 7-9*01 | 11 | TGTGCCAGCAGCTTAACAGGGaggACTGAAGCTTTCTTT<br>C A S S L T G R T E A F F                     | 1*01 | 1-1*01 | 1  |
| JF731172 | T54 | Valve Leaflet | Tricuspid Valve | 7-9*01 | 11 | TGTGCCAGCAGCcccatcccgtACAacGAGCAGTTCTTC<br>C A S S P I P Y N E Q F F                     | 1*01 | 2-1*01 | 5  |
| JF731173 | T54 | Valve Leaflet | Tricuspid       | 7-9*01 | 11 | TGTGCCAGCtcccaacCGGGAaCCTACGAGCAGTACTTC                                                  | 2*02 | 2-7*01 | 4  |

| Accession | Species | Gene          | Region          | Position | Sequence                  | Start                                                                                     | End  | Count  |    |
|-----------|---------|---------------|-----------------|----------|---------------------------|-------------------------------------------------------------------------------------------|------|--------|----|
|           |         | Valve         |                 |          | C A S S Q P G T Y E Q Y F |                                                                                           |      |        |    |
| JF731174  | T54     | Valve Leaflet | Tricuspid Valve | 7-9*01   | 11                        | TGTGCCAGCAGCTcccAGCcccaCTACGAGCAGTACTTC<br>C A S S S Q P H Y E Q Y F                      | 2*01 | 2-7*01 | 1  |
| JF731175  | T54     | Valve Leaflet | Tricuspid Valve | 7-8*01   | 13                        | TGTGCCAGCAGCccGGGACTAGCGataaCCTACGAGCAGTACTTC<br>C A S S P G L A I T Y E Q Y F            | 2*01 | 2-7*01 | 6  |
| JF731176  | T54     | Valve Leaflet | Tricuspid Valve | 7-6*01   | 13                        | TGTGCCAGCAGCACAGGGctctcgGGGGCCAACGTCCTGACTTTTC<br>C A S S T G L S G A N V L T F           | 1*01 | 2-6*01 | 2  |
| JF731177  | T54     | Valve Leaflet | Tricuspid Valve | 7-9*01   | 14                        | TGTGCCAGCAGCTTAGtgggtctggGGGACAACACTGAAGCTTTCCTTT<br>C A S S L V G L G D N T E A F F      | 1*01 | 1-1*01 | 2  |
| JF731178  | T54     | Valve Leaflet | Tricuspid Valve | 12-3*01  | 10                        | TGTGCCAGCAcccacCGGGCAGATACGCAGTATTTT<br>C A S T H R A D T Q Y F                           | 2*01 | 2-3*01 | 5  |
| JF731179  | T54     | Valve Leaflet | Tricuspid Valve | 12-3*01  | 11                        | TGTGCCAGCgcatcGGGACTAGgcGAGACCCAGTACTTC<br>C A S A S G L G E T Q Y F                      | 2*01 | 2-5*01 | 6  |
| JF731180  | T54     | Valve Leaflet | Tricuspid Valve | 12-3*01  | 11                        | TGTGCCAGCAGTTTtaACAGGGGacATGGCTACACCTTC<br>C A S S F N R G H G Y T F                      | 1*01 | 1-2*01 | 2  |
| JF731181  | T54     | Valve Leaflet | Tricuspid Valve | 12-3*01  | 15                        | TGTGCCAGCAGcgctctGGGACTAGCattgggcgctcGAGACCCAGTACTTC<br>C A S S A L G L A L G V E T Q Y F | 2*01 | 2-5*01 | 1  |
| JF731182  | T19     | Valve Leaflet | Tricuspid Valve | 5-1*01   | 11                        | TGCGCCAGCAaaacgcctAACACCGGGGAGCTGTTTTTTT<br>C A S K T P N T G E L F F                     | none | 2-2*01 | 7  |
| JF731183  | T19     | Valve Leaflet | Tricuspid Valve | 5-1*01   | 13                        | TGCGCCAGCAGCcaaGGACAGcattcCTCCTACGAGCAGTATTTTC<br>C A S S Q G Q H S S Y E Q Y F           | 1*01 | 2-7*01 | 10 |
| JF731184  | T19     | Valve Leaflet | Tricuspid Valve | 5-6*01   | 13                        | TGTGCCAGCAGCTcaAGGGGaggtgGCAATCAGCCCCAGCATTTT<br>C A S S S R G G G N Q P Q H F            | 1*01 | 1-5*01 | 6  |
| JF731185  | B38     | Valve Leaflet | Bicuspid Valve  | 5-1*01   | 11                        | TGCGCCAGCAGCTTGGggcaCGGAGATACGCAGTATTTT                                                   | 2*01 | 2-3*01 | 3  |

C A S S L G H G D T Q Y F

|          |     |               |                 |        |    |                                                                                    |      |        |    |
|----------|-----|---------------|-----------------|--------|----|------------------------------------------------------------------------------------|------|--------|----|
| JF731186 | B38 | Valve Leaflet | Bicuspid Valve  | 5-1*01 | 13 | TGCGCCAGCAGCgcccGGGACAGGGGACCAAGAGACCCAGTACTTC<br>C A S S A G T G D Q E T Q Y F    | 1*01 | 2-5*01 | 6  |
| JF731187 | B38 | Valve Leaflet | Bicuspid Valve  | 5-1*01 | 13 | TGCGCCAGCAGCTTGGcaGGGAGatAttACAGATACGCAGTATTTT<br>C A S S L A G R F T D T Q Y F    | 2*02 | 2-3*01 | 16 |
| JF731188 | B38 | Valve Leaflet | Bicuspid Valve  | 5-4*01 | 14 | TGTGCCAGCAGCTTGGaaGGAAaCTCTGGGGCCAACGTCTGACTTTC<br>C A S S L E G N S G A N V L T F | 2*01 | 2-6*01 | 9  |
| JF731189 | T55 | Valve Leaflet | Tricuspid Valve | 15*01  | 12 | TGTGCCACCAGCAGtGGACAGGGagacGAGACCCAGTACTTC<br>C A T S S G Q G D E T Q Y F          | 1*01 | 2-5*01 | 22 |
| JF731190 | T56 | Valve Leaflet | Tricuspid Valve | 28*01  | 10 | TGTGCCAGCAGTcgaGACgtAGAGACCCAGTACTTC<br>C A S S R D V E T Q Y F                    | 2*01 | 2-5*01 | 3  |
| JF731191 | T56 | Valve Leaflet | Tricuspid Valve | 28*01  | 10 | TGTGCCAGCAGTTccccAATCAGCCCCAGCATTTT<br>C A S S S P N Q P Q H F                     | none | 1-5*01 | 4  |
| JF731192 | T56 | Valve Leaflet | Tricuspid Valve | 28*01  | 11 | TGTGCCAGCAGTTTcgcacCTAACTATGGCTACACCTTC<br>C A S S F A P N Y G Y T F               | none | 1-2*01 | 1  |
| JF731193 | T56 | Valve Leaflet | Tricuspid Valve | 28*01  | 11 | TGTGCCAGCAGTGGGgaacagcCCTACGAGCAGTACTTC<br>C A S S G E Q P Y E Q Y F               | 2*01 | 2-7*01 | 2  |
| JF731194 | T56 | Valve Leaflet | Tricuspid Valve | 28*01  | 12 | TGTGCCAGCAGTTTcaGGACcggTACAATGAGCAGTTCTTC<br>C A S S F R T G Y N E Q F F           | 2*01 | 2-1*01 | 2  |
| JF731195 | T56 | Valve Leaflet | Tricuspid Valve | 28*01  | 12 | TGTGCCAGCAGTaaCGttgcGGGcttaTATGGCTACACCTTC<br>C A S S N V A G L Y G Y T F          | 1*01 | 1-2*01 | 2  |
| JF731196 | T56 | Valve Leaflet | Tricuspid Valve | 28*01  | 12 | TGTGCCAGCAGTTccaagcccGGGACAGGGtttCAGTACTTC<br>C A S S S K P G T G F Q Y F          | 1*01 | 2-7*01 | 3  |
| JF731197 | T56 | Valve Leaflet | Tricuspid Valve | 28*01  | 12 | TGTGCCAGCAGTTccaaACAGGGtAACACTGAAGCTTTCTTT<br>C A S S S K Q G N T E A F F          | 1*01 | 1-1*01 | 2  |

|          |     |                                 |                 |         |    |                                                                                          |      |        |    |
|----------|-----|---------------------------------|-----------------|---------|----|------------------------------------------------------------------------------------------|------|--------|----|
| JF731198 | T56 | Valve Leaflet                   | Tricuspid Valve | 28*01   | 13 | TGTGCCAGCAGacacggggcCAGGGGAATTCACCCCTCCACTTT<br>C A S R H G A R G N S P L H F            | 1*01 | 1-6*01 | 1  |
| JF731199 | T56 | Valve Leaflet                   | Tricuspid Valve | 28*01   | 13 | TGTGCCAGCAGTTTttcaGACAcCTCTGGAAACACCATATATTTT<br>C A S S F S D T S G N T I Y F           | 1*01 | 1-3*01 | 2  |
| JF731200 | T56 | Valve Leaflet                   | Tricuspid Valve | 28*01   | 13 | TGTGCCAGCAGTTTATGgcGGGGCtgggCACTGAAGCTTCTTT<br>C A S S L W R G L G T E A F F             | 1*01 | 1-1*01 | 1  |
| JF731201 | T56 | Valve Leaflet                   | Tricuspid Valve | 28*01   | 13 | TGTGCCAGCAattcACTAGCGGtAGCACAGATACGCAGTATTTT<br>C A S T F T S G S T D T Q Y F            | 2*01 | 2-3*01 | 2  |
| JF731202 | T56 | Valve Leaflet                   | Tricuspid Valve | 28*01   | 14 | TGTGCCAGCAGgggataggCAGGGGgcccgcgGAGACCCAGTACTTC<br>C A S R G I G R G A A E T Q Y F       | 1*01 | 2-5*01 | 2  |
| JF731203 | T56 | Valve Leaflet                   | Tricuspid Valve | 28*01   | 14 | TGTGCCAGCAGTcctcgacGGAGaactAACCCGGGAGCTGTTTTTT<br>C A S S P R R R T N T G E L F F        | 2*02 | 2-2*01 | 3  |
| JF731204 | T56 | Valve Leaflet                   | Tricuspid Valve | 28*01   | 14 | TGTGCCAGCAccccgtaggGGGACggAGCACAGATACGCAGTATTTT<br>C A S T P V G G R S T D T Q Y F       | 2*01 | 2-3*01 | 6  |
| JF731205 | T56 | Valve Leaflet                   | Tricuspid Valve | 5-8*01  | 13 | TGTGCCAGCAGCGtaACAGGGGgaccgtaTACGAGCAGTACTTC<br>C A S S V T G G P V Y E Q Y F            | 1*01 | 2-7*01 | 1  |
| JF731206 | T54 | Circulating CD8+CD28neg T cells | Tricuspid Valve | 12-3*01 | 15 | TGTGCCAGCAGctccacagggGCGGGAGGGtccgtCAATGAGCAGTTCTTC<br>C A S S S T G A G G S V N E Q F F | 2*02 | 2-1*01 | 18 |
| JF731207 | T55 | Circulating CD8+CD28neg T cells | Tricuspid Valve | 11-2*01 | 12 | TGTGCCAGCAGCTcGGGACAGGtgCAAGAGACCCAGTACTTC<br>C A S S S G Q V Q E T Q Y F                | 1*01 | 2-5*01 | 14 |
| JF731208 | T55 | Circulating CD8+CD28neg T cells | Tricuspid Valve | 11-3*01 | 12 | TGTGCCAGCAGCTTActGGACAcgcacggTACGCAGTATTTTC<br>C A S S L L D T H G T Q Y F               | 1*01 | 2-3*01 | 6  |
| JF731209 | T55 | Circulating                     | Tricuspid       | 15*01   | 12 | TGTGCCACCAGCGGGACAGGgaggtgggCTGAAGCTTCTTT                                                | 1*01 | 1-1*01 | 21 |







|          |     |                                         |                    |        |    |                                                                                         |      |        |    |
|----------|-----|-----------------------------------------|--------------------|--------|----|-----------------------------------------------------------------------------------------|------|--------|----|
| JF731229 | B46 | Circulating<br>CD8+CD28+ T<br>cells     | Bicuspid<br>Valve  | 5-1*01 | 13 | TGCGCCAGCAGCTTGGagtac <u>GGAGGG</u> ggAGATACGCAGTATTTT<br>C A S S L E Y G G G D T Q Y F | 2*02 | 2-3*01 | 15 |
| JF731230 | T57 | Circulating<br>CD4 <sup>+</sup> T cells | Tricuspid<br>Valve | 7-2*01 | 12 | TGTGCCAGCAGactca <u>AGGGG</u> cggaatTATGGCTACACCTTC<br>C A S R L K G R N Y G Y T F      | 1*01 | 1-2*01 | 16 |
| JF731231 | T57 | Circulating<br>CD4 <sup>+</sup> T cells | Tricuspid<br>Valve | 7-2*01 | 12 | TGTGCCAGCAGCccc <u>GACAG</u> tgctcagACTGAAGCTTTCTTT<br>C A S S P D S A Q T E A F F      | 1*01 | 1-1*01 | 16 |
| JF731232 | B46 | Circulating<br>CD4 <sup>+</sup> T cells | Bicuspid<br>Valve  | 5-1*01 | 13 | TGCGCCAGCAGCTTGaccg <u>GGGACAGGG</u> cGAGACCCAGTACTTC<br>C A S S L T G D R A E T Q Y F  | 1*01 | 2-5*01 | 9  |

\*Upper case denotes germ line residues encoded respectively by the TRBV element, TRBD element (underlined) and TRBJ element. Lower case denotes N or P non-germline encoded nucleotides. † The number of identical TCRB sequences found in the sample that comprise the expanded clone, of which only one has been entered in Genbank.
